# Supplementary material for: Genomic Epidemiology of SARS-CoV-2 in Esteio, Rio Grande do Sul, Brazil
Source: bioRxiv or medRxiv preprint supplement (doi:10.1101/2021.01.21.21249906), 2021-01-26

# Sample 1

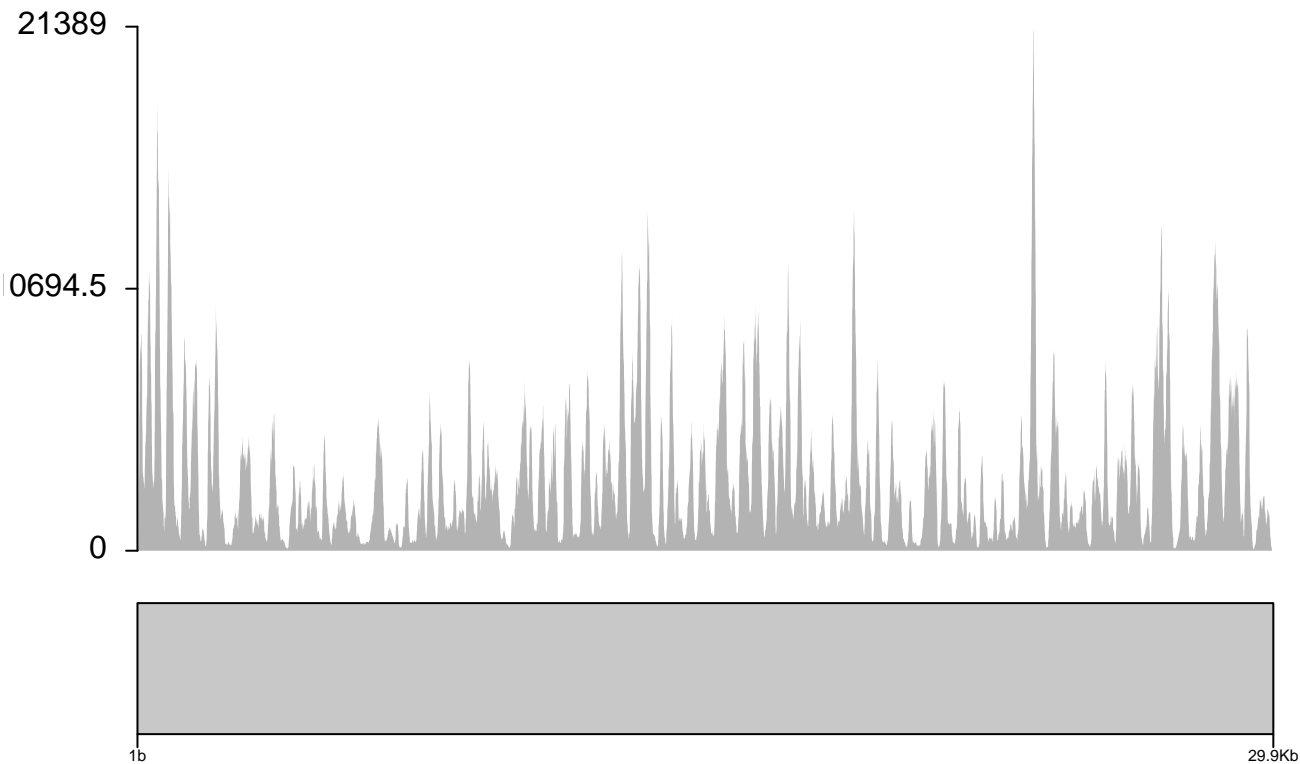

# Sample 2

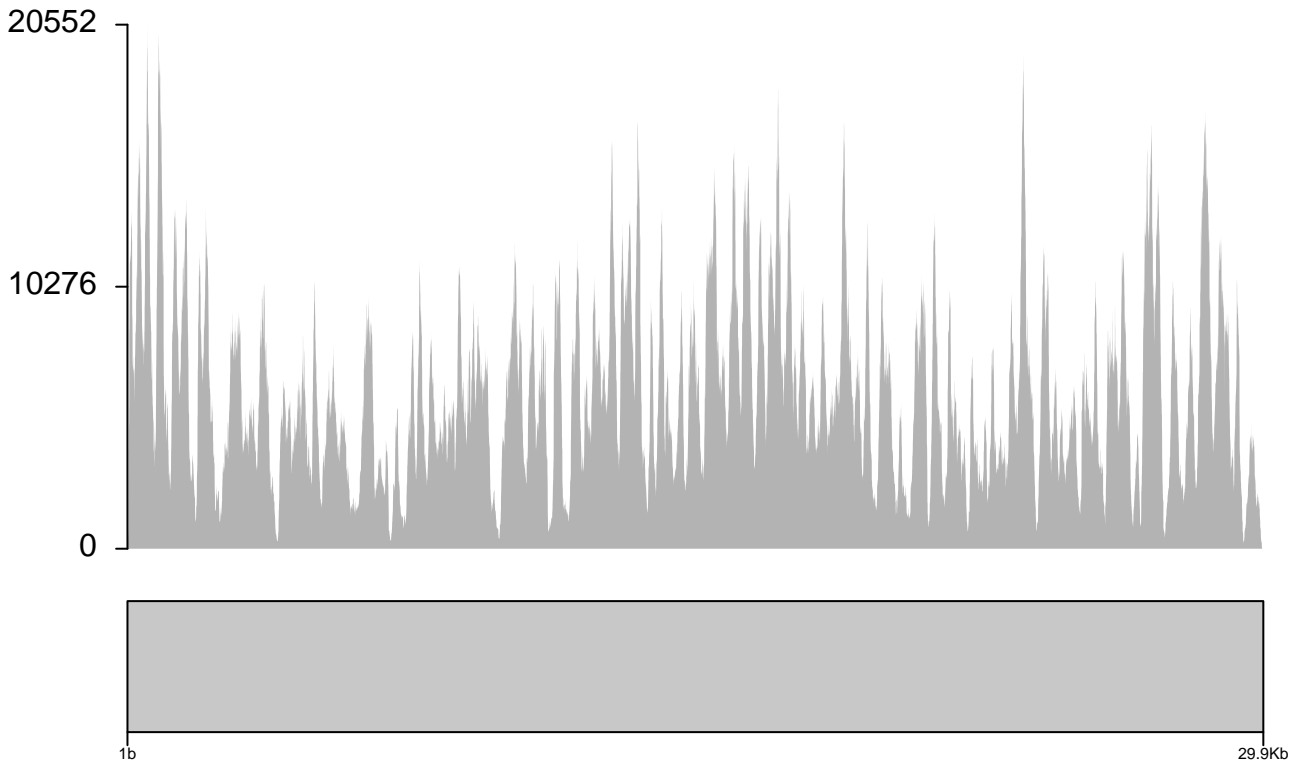

# Sample 3

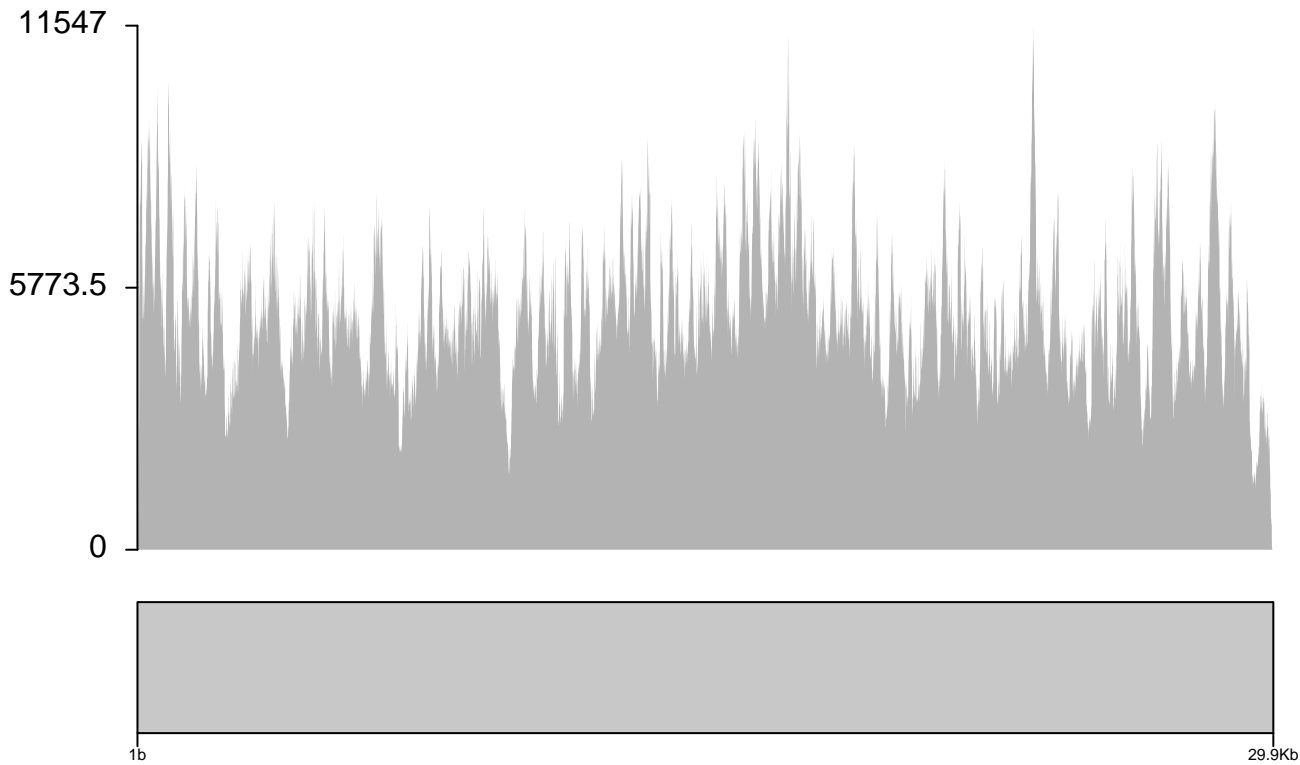

# Sample 4

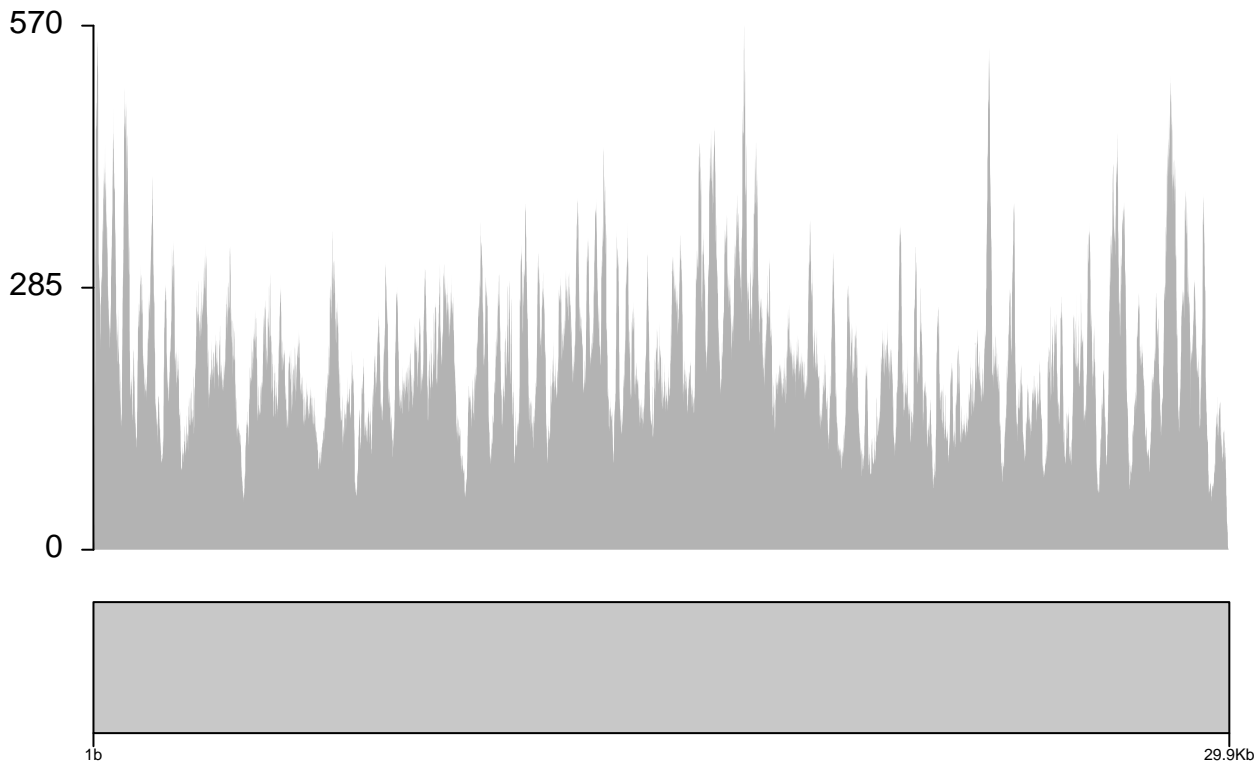

# Sample 5

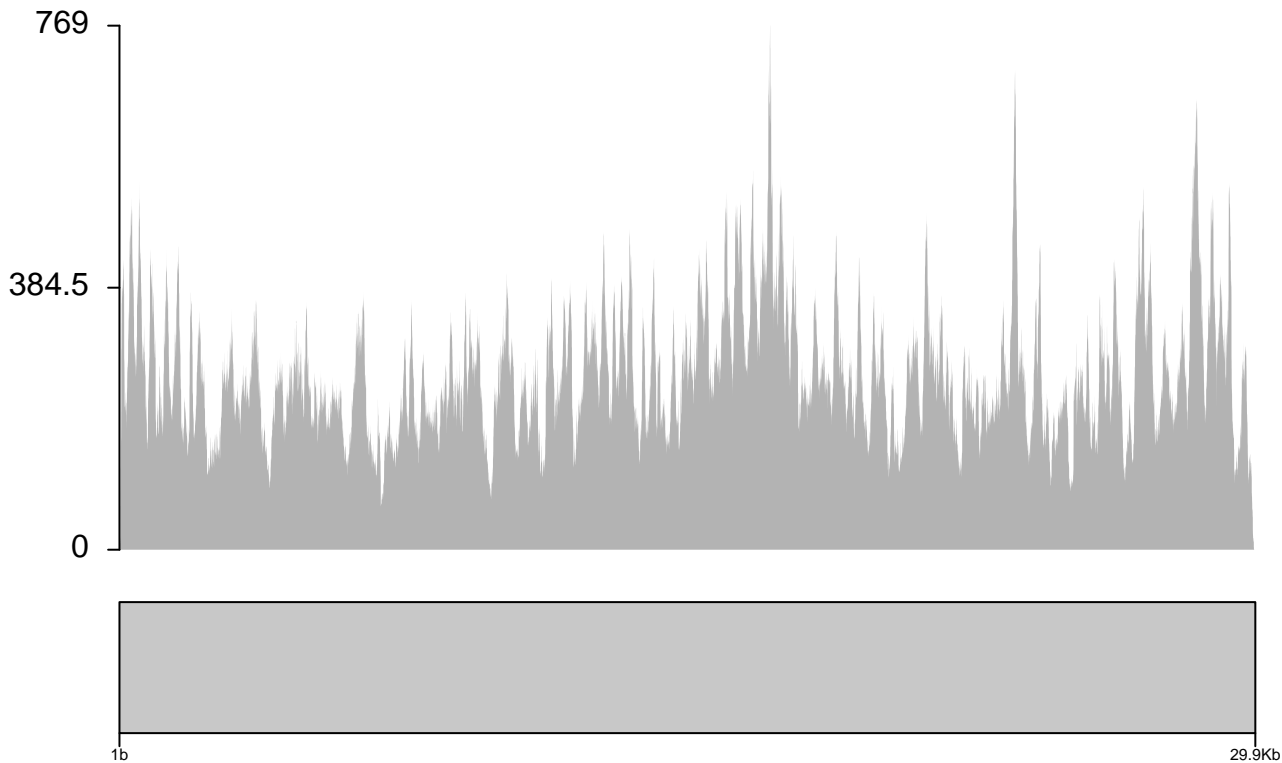

# Sample 6

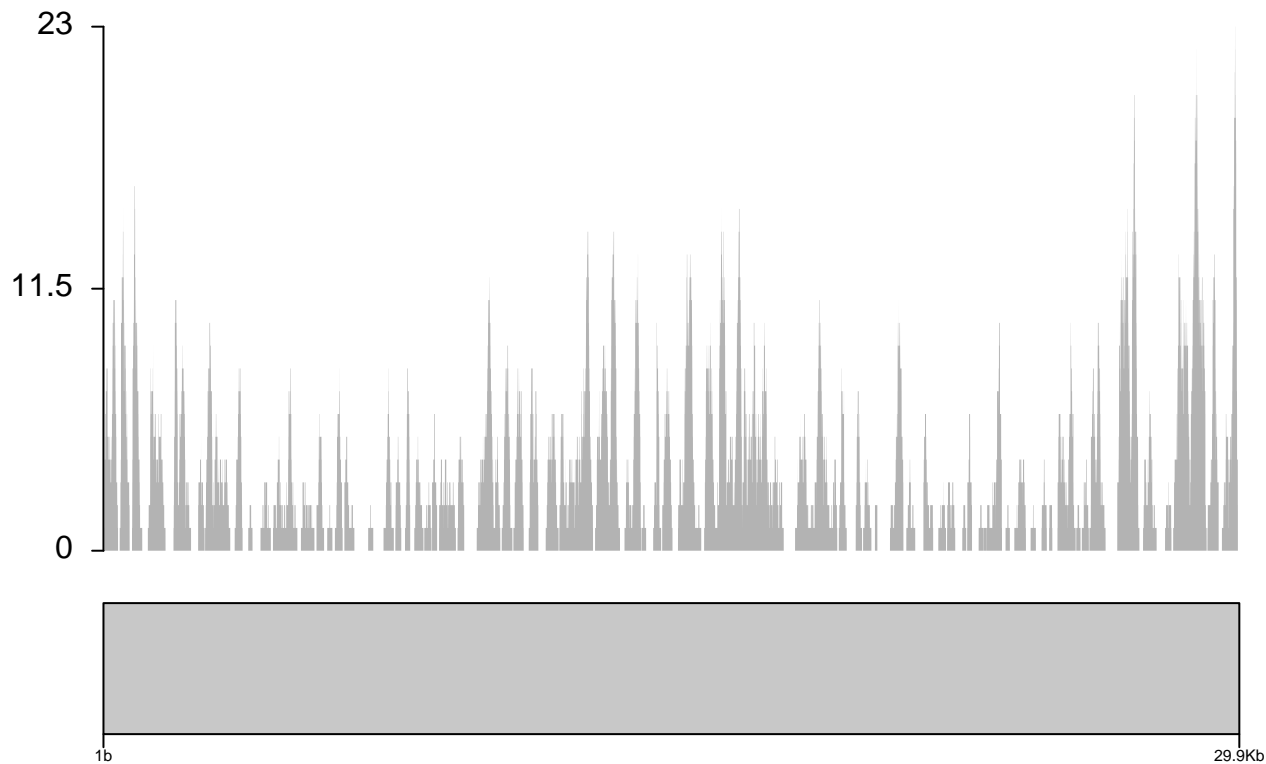

# Sample 7

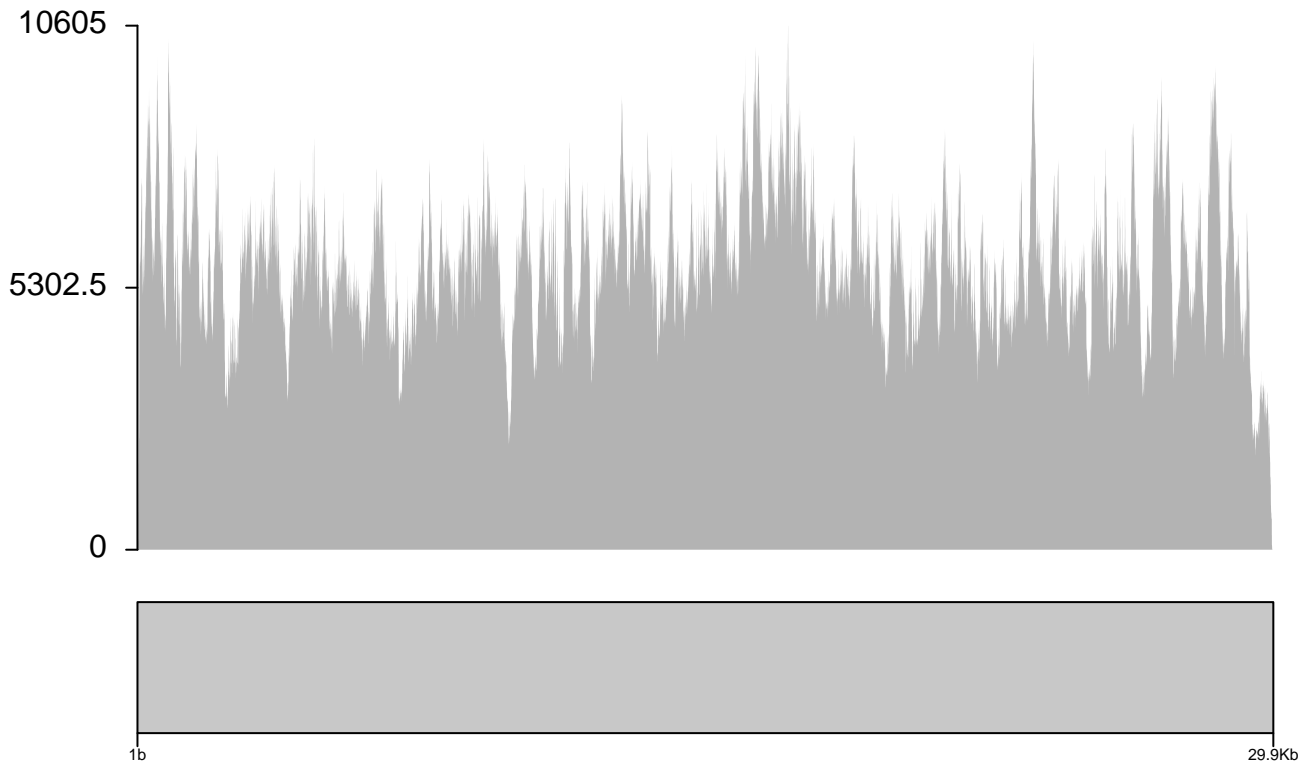

# Sample 8

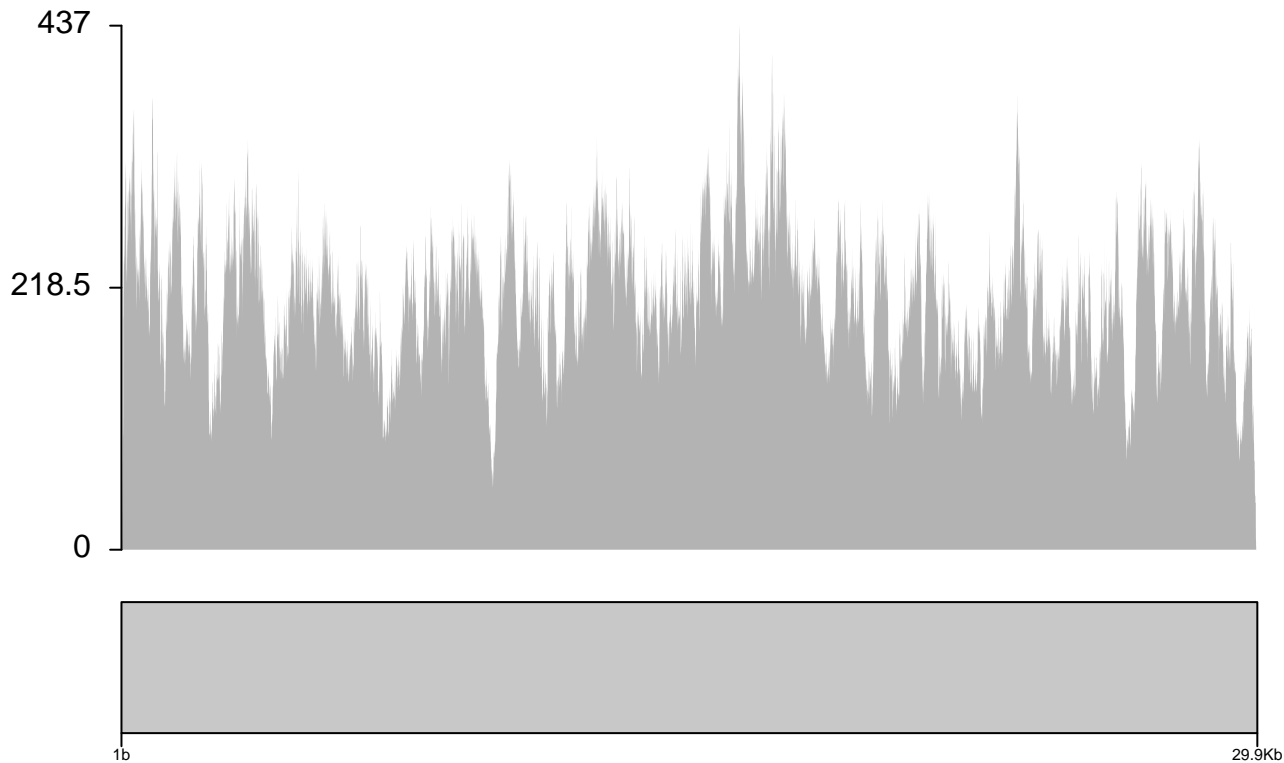



# Sample 9

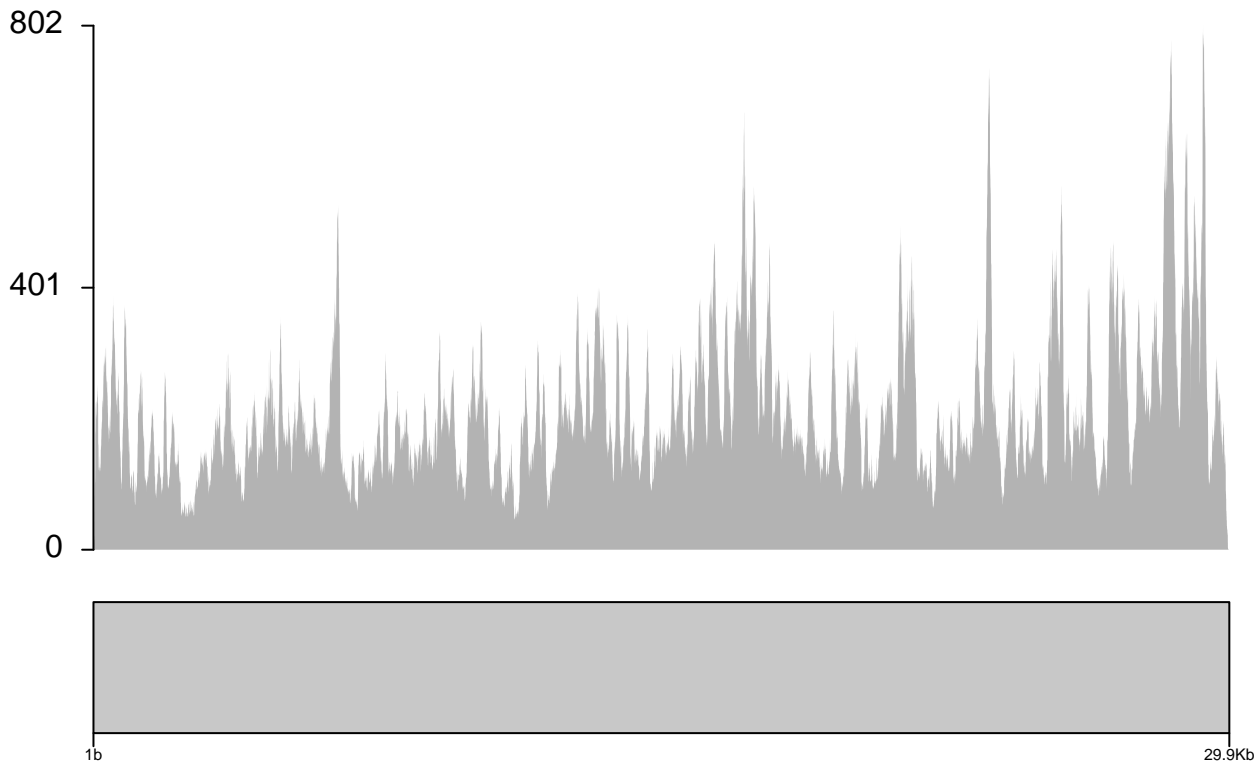

# Sample 10

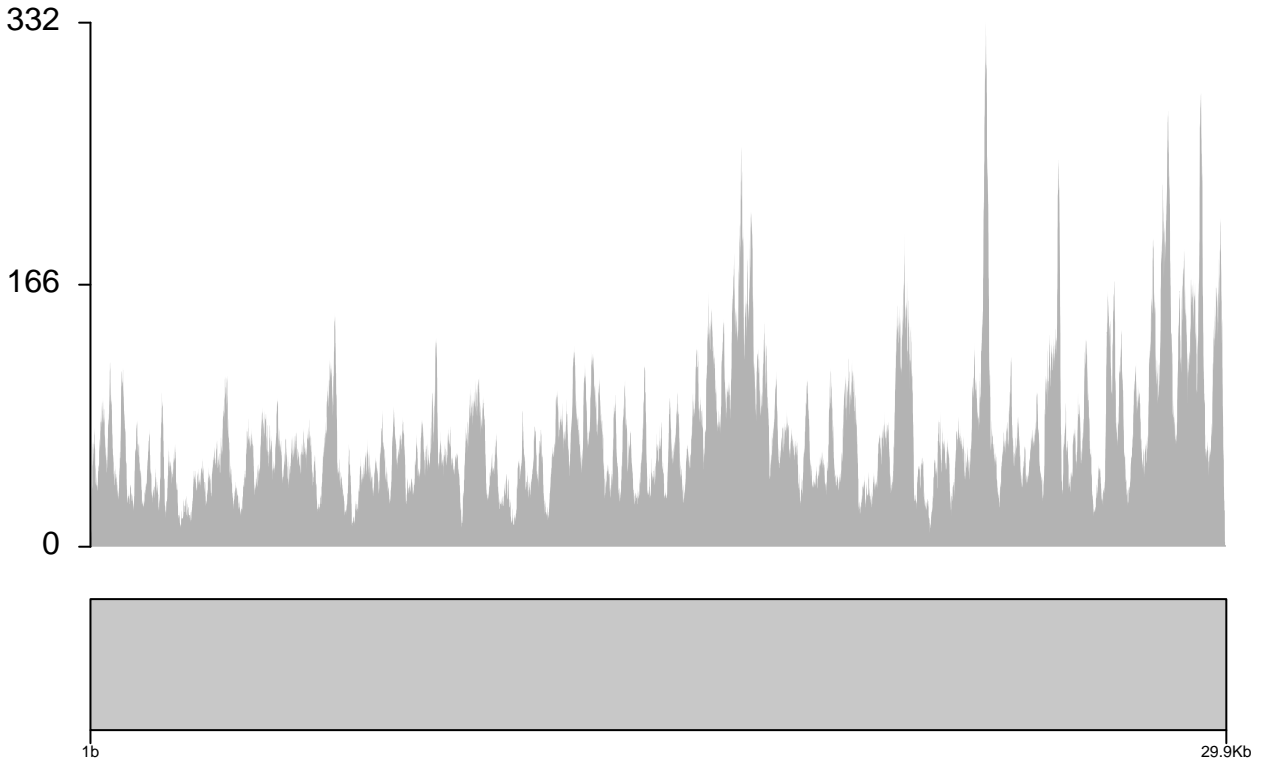

# Sample 11

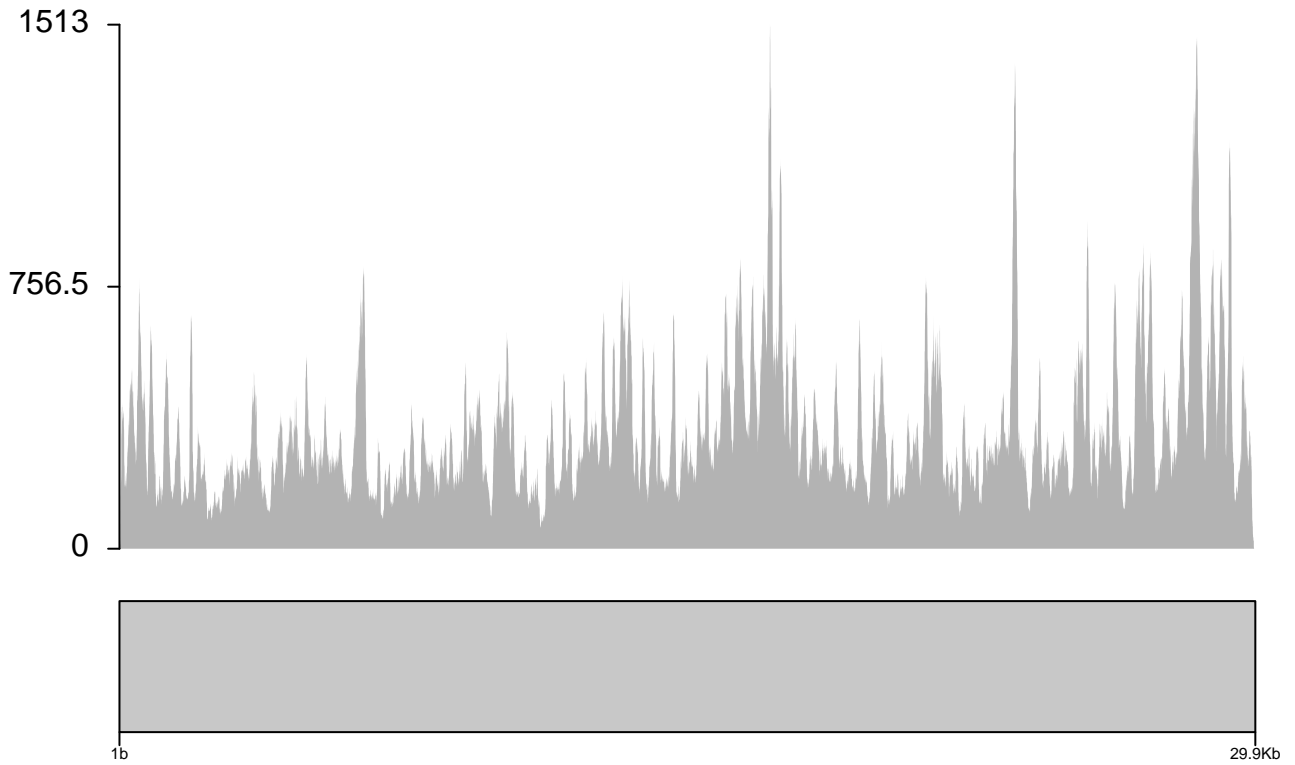

# Sample 12

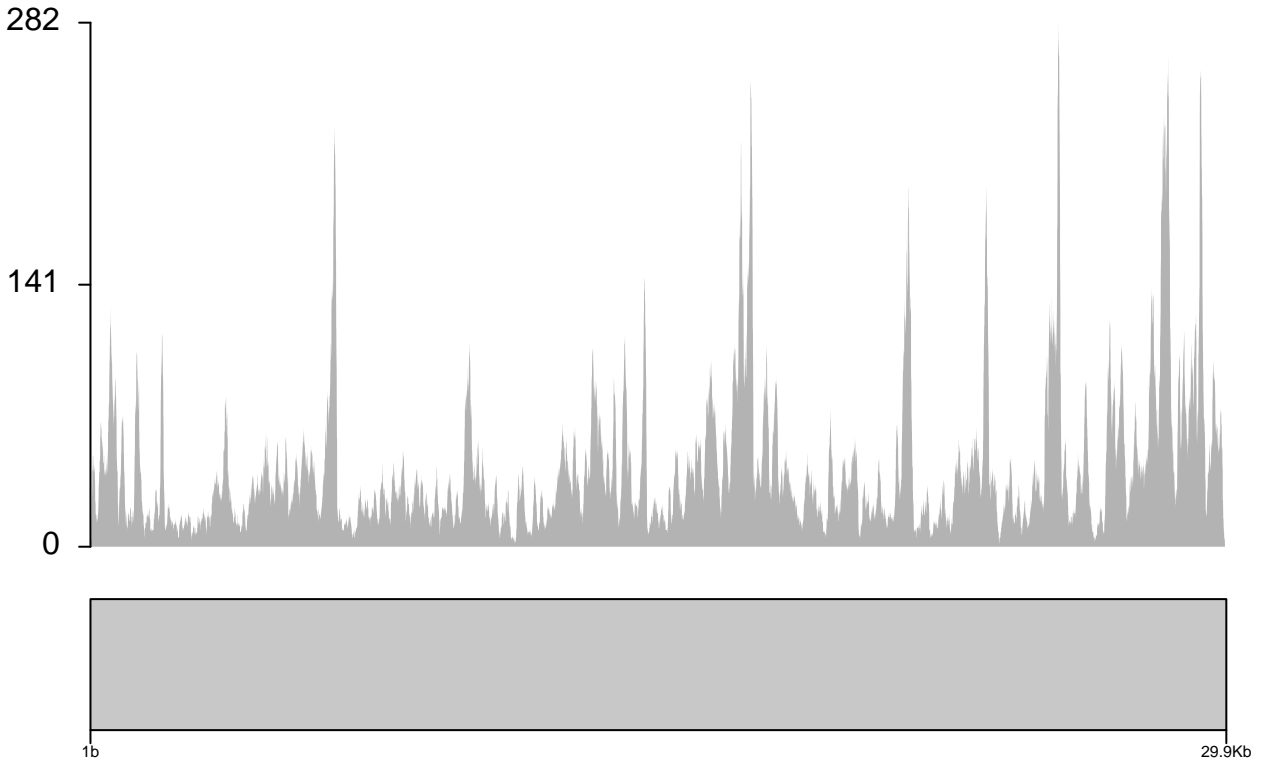

# Sample 13

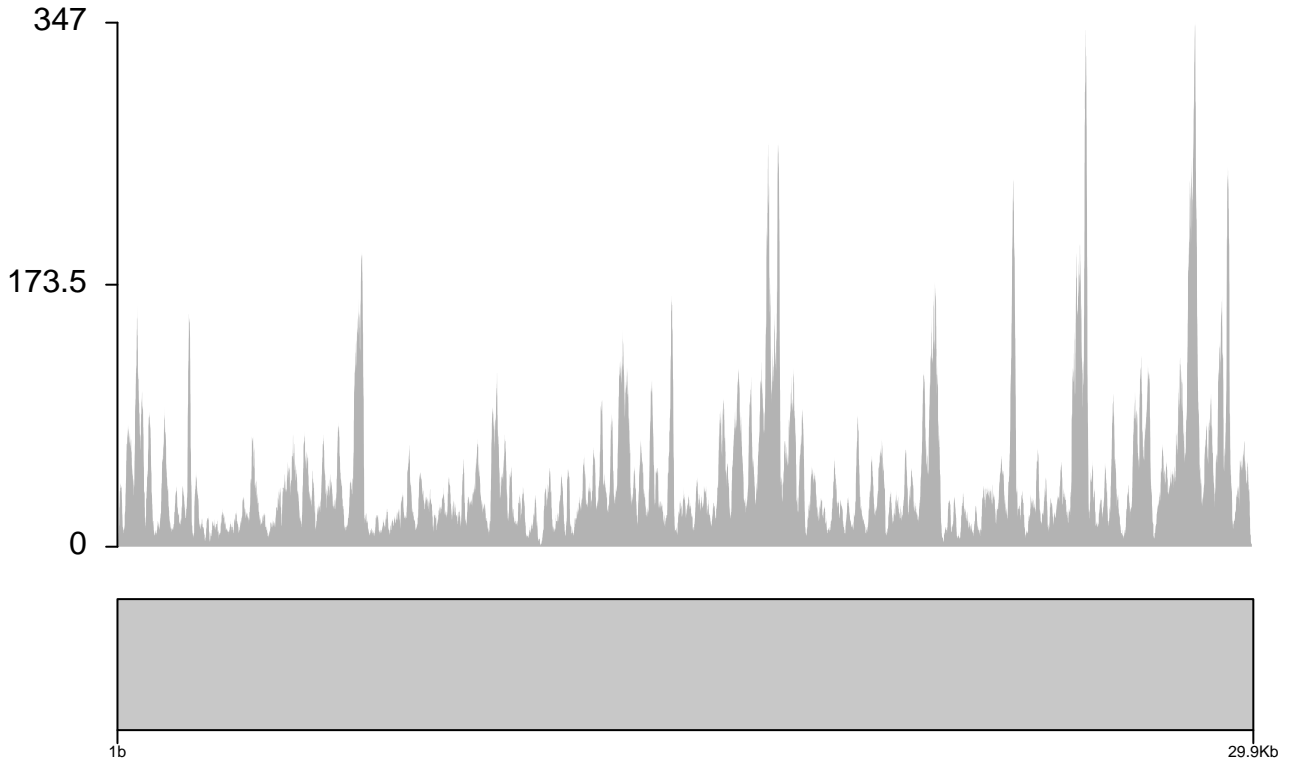

# Sample 14

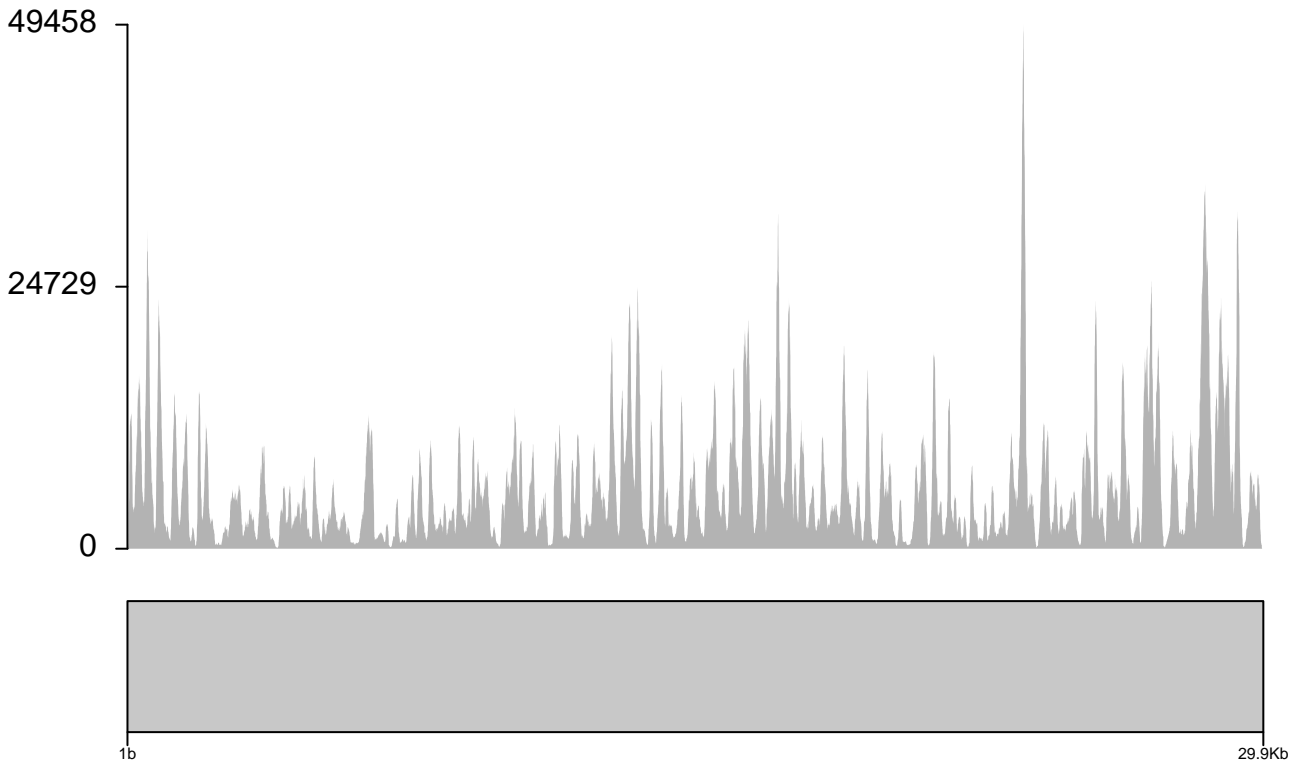

# Sample 15

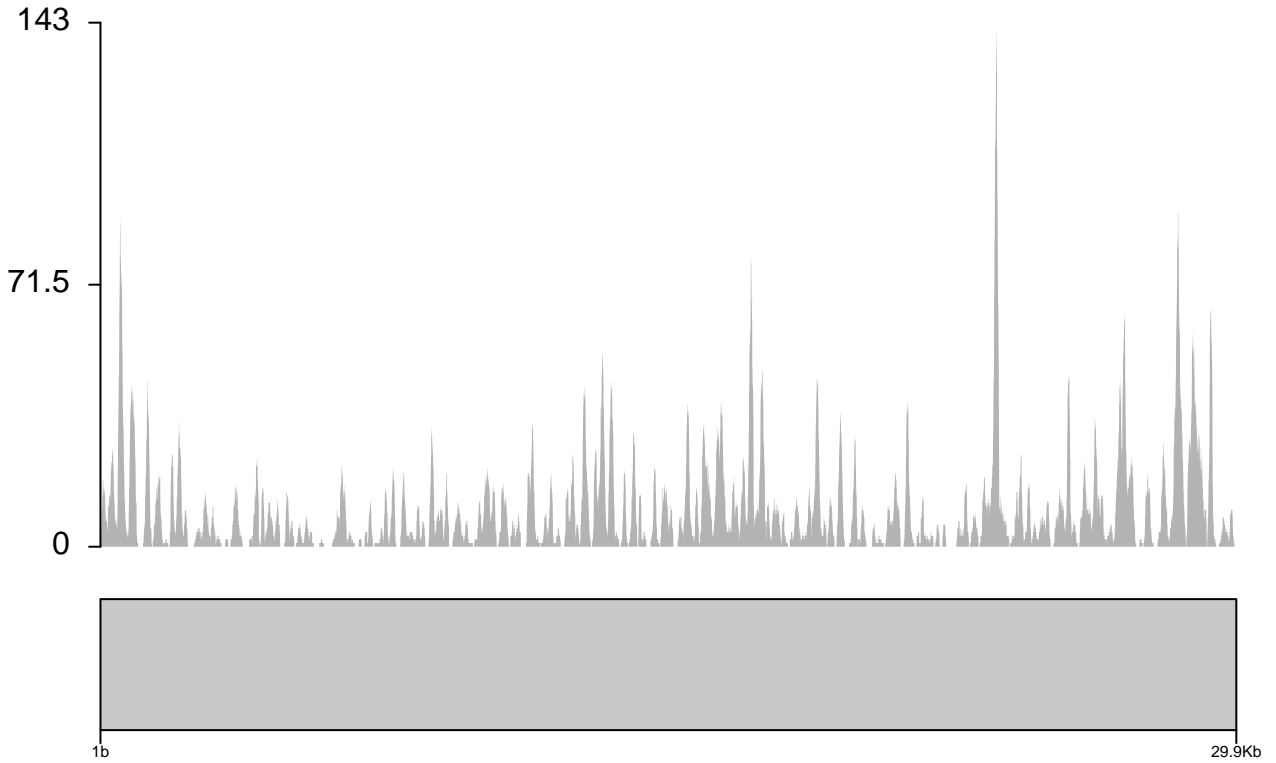

# Sample 16

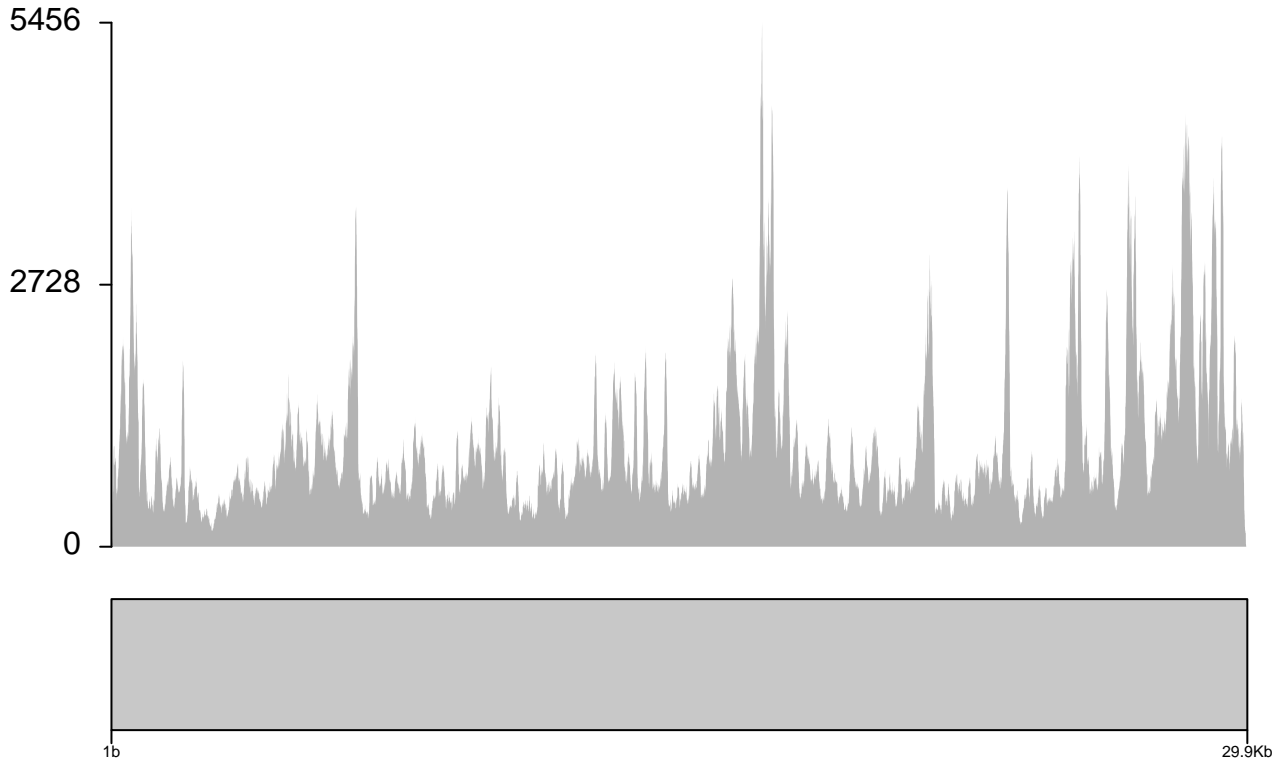



# Sample 17

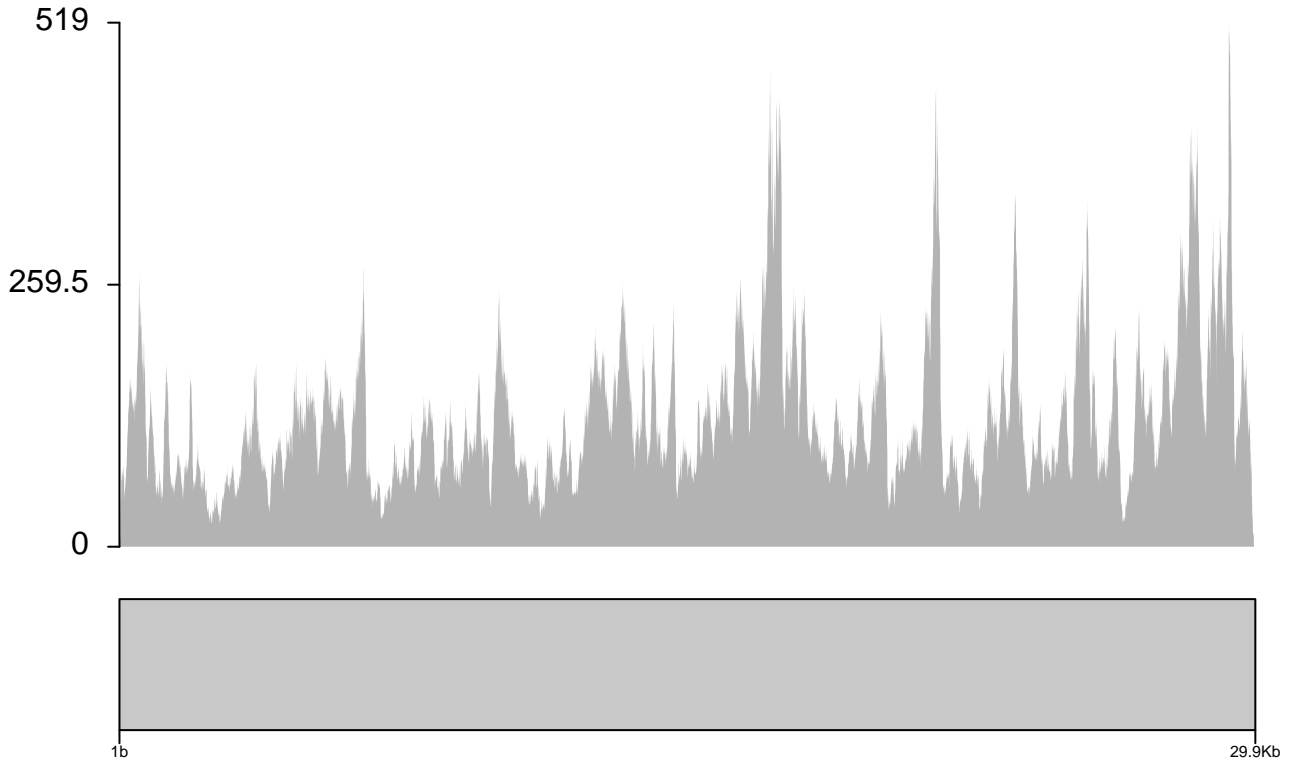

# Sample 18

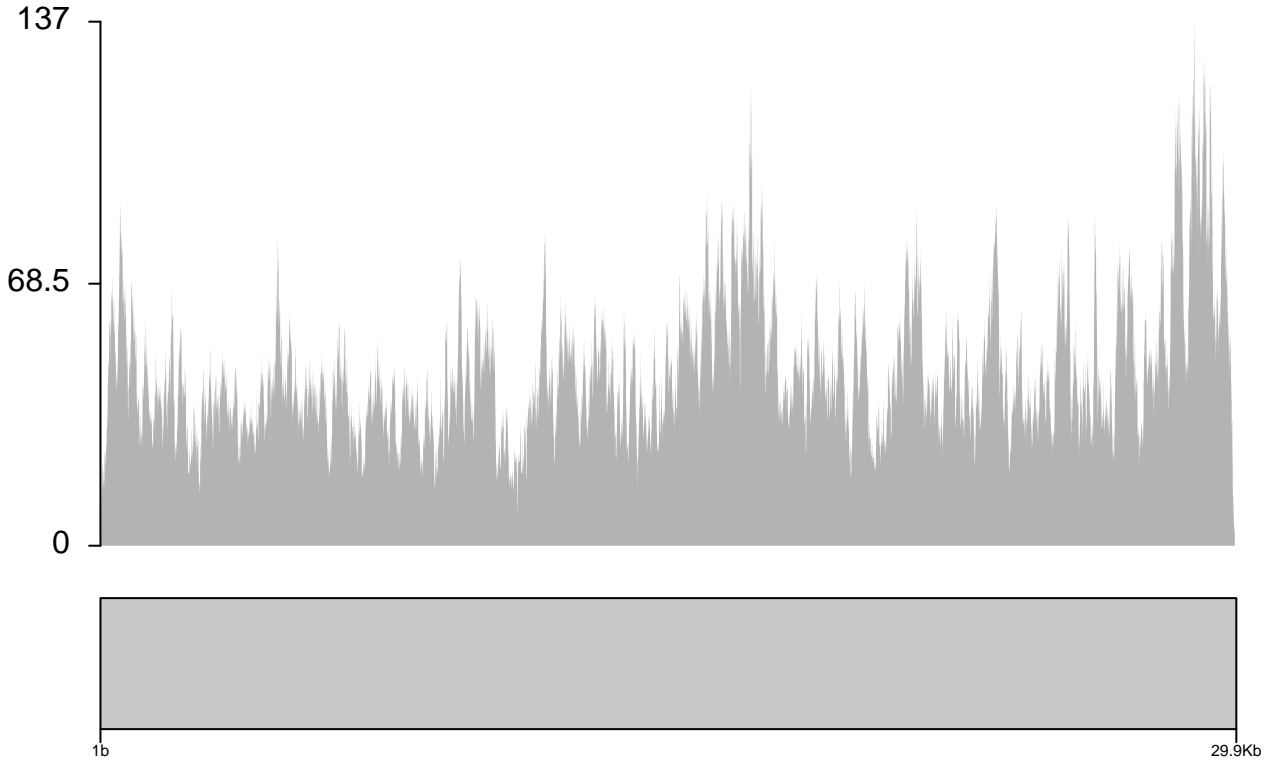

# Sample 19

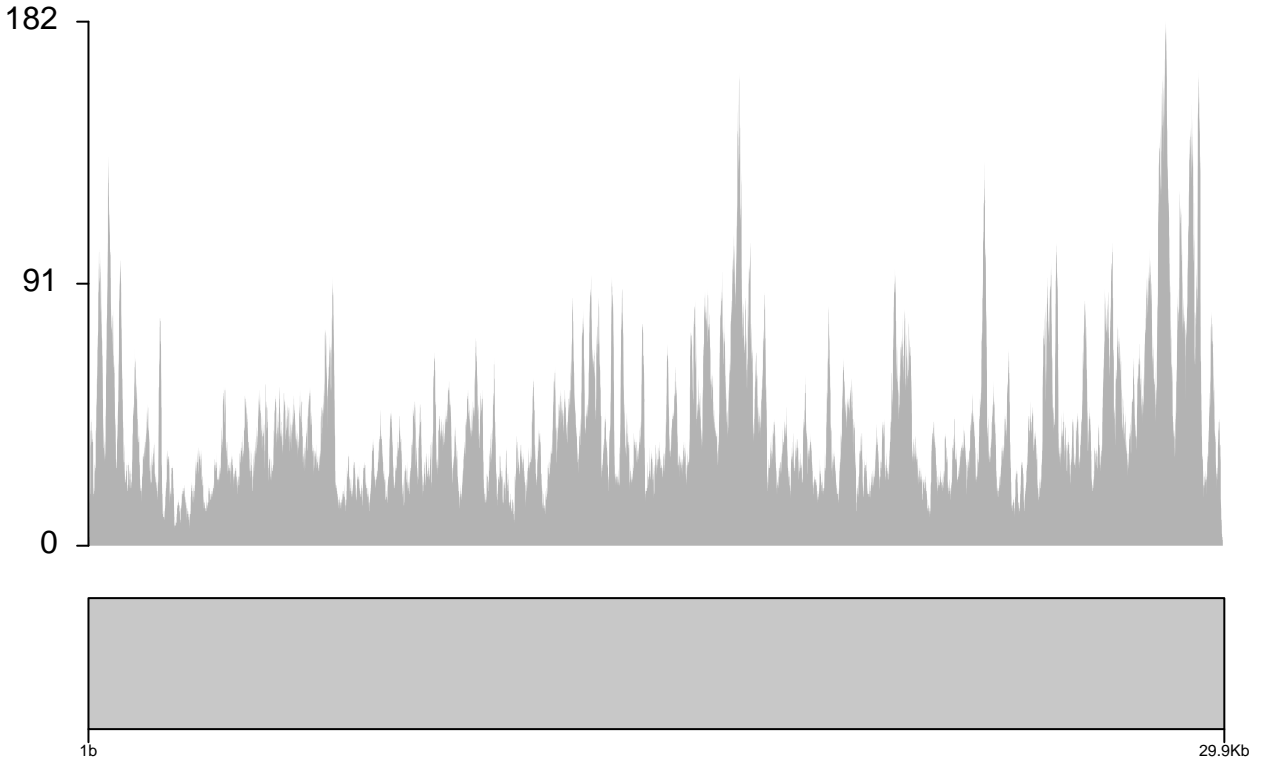

# Sample 20

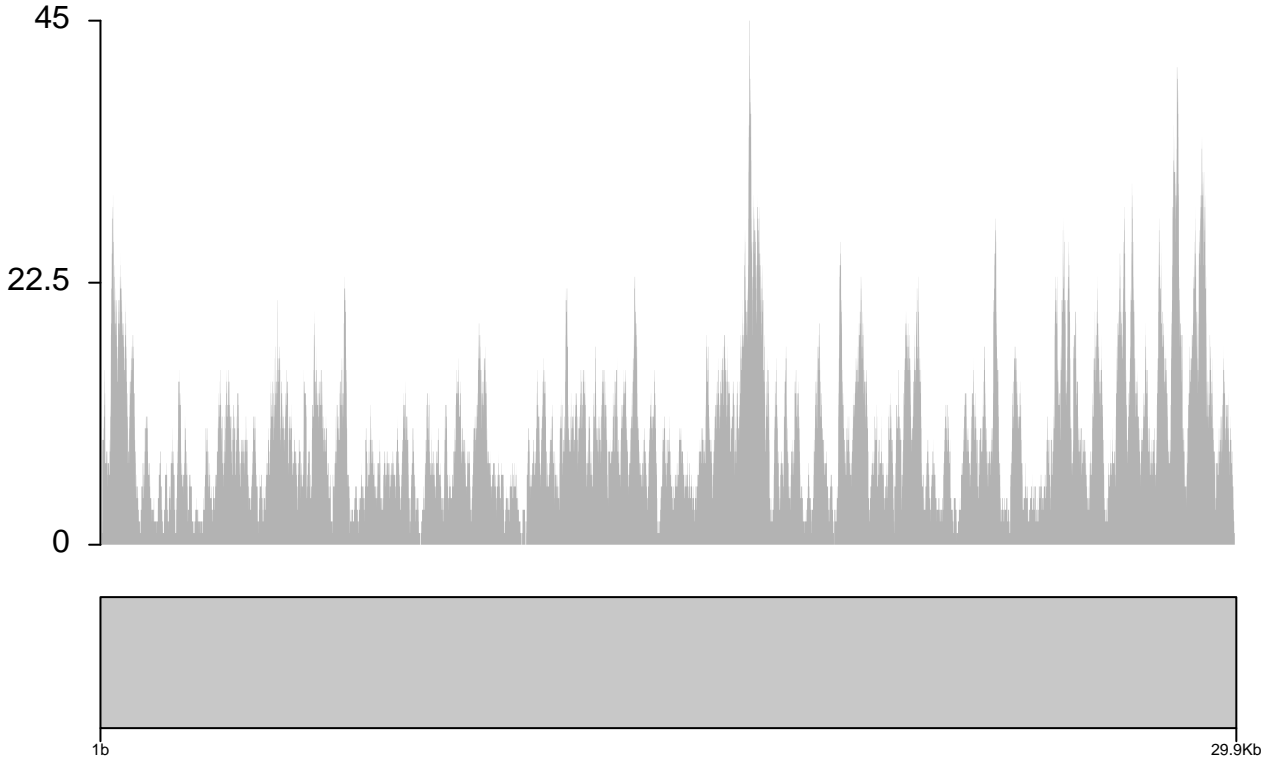

# Sample 21

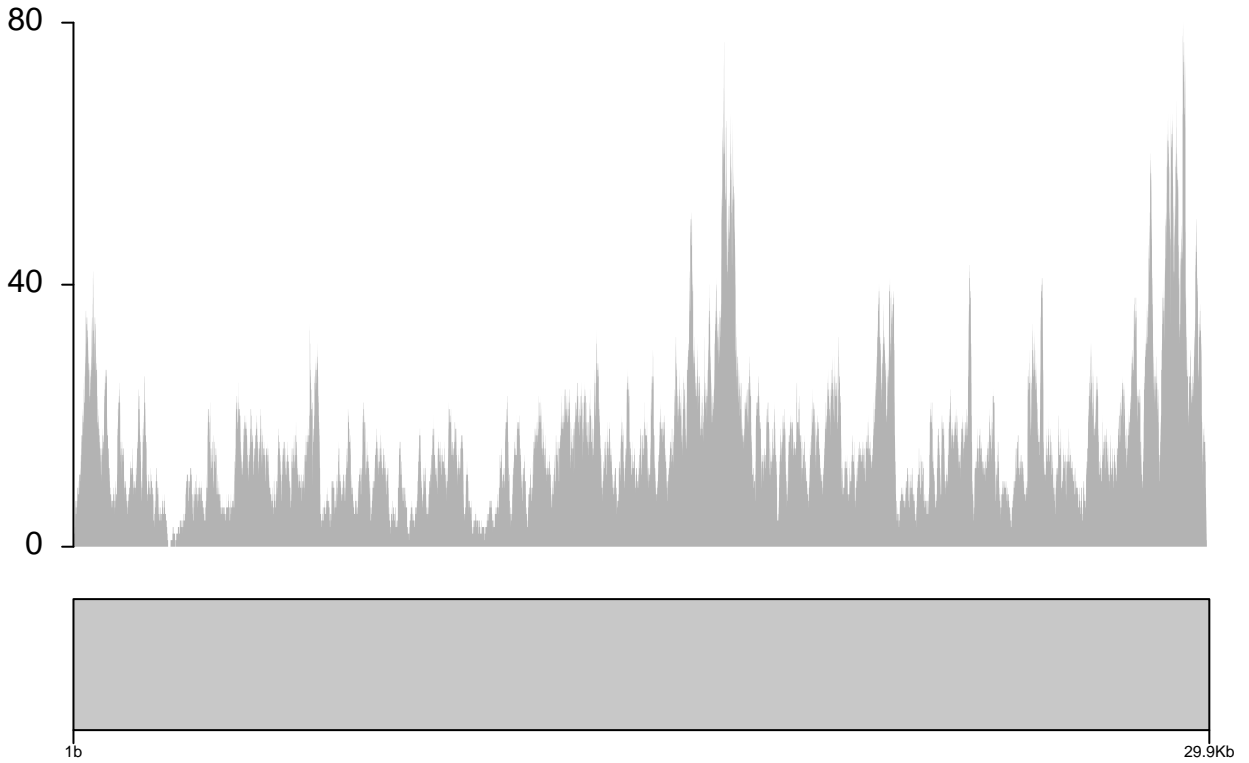

Supplement: Supplementary file [file media-2.pdf]
