# Supplementary material for: Genomic Epidemiology of SARS-CoV-2 in Esteio, Rio Grande do Sul, Brazil
Source: bioRxiv or medRxiv preprint supplement (doi:10.1101/2021.01.21.21249906), 2021-01-26
Supplement: Supplementary file [file media-3.pdf]

**Supplemental File 2.** Detailed view of mutations across all samples. Nucleotide mutation positions are represented as rows. Each mutation has its own color. Cluster 1 and cluster 2 specific-mutations are colored in black and burnt yellow, respectively. Mutations related to Rio de Janeiro's new lineage are colored in red.

| Sample    | 1     | 2     | 3     | 4     | 5     | 6     | 7     | 8     | 9     | 10    | 11    | 12    | 13    | 14    | 15    | 16    | 17    | 18    | 19    | 20    | 21    |       |
|-----------|-------|-------|-------|-------|-------|-------|-------|-------|-------|-------|-------|-------|-------|-------|-------|-------|-------|-------|-------|-------|-------|-------|
| Mutations | 241   | 241   | 147   | 241   | 147   | 28883 | 241   | 241   | 241   | 241   | 241   | 241   | 241   | 241   | 106   | 241   | 241   | 241   | 241   | 16207 | 241   |       |
|           | 3037  | 3037  | 241   | 3037  | 241   |       | 3037  | 2276  | 3037  | 3037  | 2276  | 3037  | 3037  | 3037  | 241   | 1218  | 2675  | 3037  | 3037  | 25245 | 3766  |       |
|           | 8094  | 11211 | 850   | 14408 | 850   |       | 11283 | 3037  | 12053 | 4706  | 3037  | 14408 | 13804 | 7005  | 23403 | 3037  | 3037  | 3766  | 7393  | 25494 | 4423  |       |
|           | 14408 | 11758 | 3037  | 14805 | 3037  |       | 13804 | 4644  | 14408 | 9167  | 8802  | 15720 | 14408 | 12053 | 28881 | 5339  | 7005  | 6218  | 12053 | 27205 | 12964 |       |
|           | 23403 | 12484 | 12053 | 15654 | 6896  |       | 14408 | 14408 | 23403 | 12053 | 10681 | 21191 | 19972 | 14408 | 28882 | 14408 | 12053 | 10667 | 14408 | 27299 | 14408 |       |
|           | 27299 | 14408 | 14408 | 23403 | 12053 |       | 23400 | 18252 | 25088 | 14408 | 14408 | 23403 | 20871 | 23403 | 28883 | 15654 | 14408 | 11824 | 14593 | 27501 | 23012 |       |
|           | 28881 | 20679 | 20016 | 25718 | 14408 |       | 27299 | 23403 | 25429 | 16912 | 18252 | 23455 | 23403 | 25088 |       | 23403 | 23403 | 12053 | 23403 | 28881 | 23403 |       |
|           | 28882 | 23403 | 23403 | 27299 | 20016 |       | 28881 | 27299 | 25509 | 23403 | 18395 | 25062 | 24928 | 25429 |       | 27299 | 25088 | 12964 | 25088 | 28882 | 28253 |       |
|           | 28883 | 27299 | 25088 | 28881 | 23403 |       | 28882 | 28093 | 27976 | 23593 | 22254 | 27299 | 28881 | 25509 |       | 28881 | 25429 | 14408 | 25429 | 28883 | 28628 |       |
|           | 29148 | 28881 | 25207 | 28882 | 25088 |       | 28883 | 28881 | 28881 | 25088 | 23403 | 28881 | 28882 | 26019 |       | 28882 | 25509 | 23012 | 25509 | 29148 | 28881 |       |
|           |       | 28882 | 25642 | 28883 | 25207 |       | 29148 | 28882 | 28882 | 27828 | 27299 | 28882 | 28883 | 27976 |       | 28883 | 26019 | 23403 | 27976 |       | 28882 |       |
|           |       | 28883 | 28393 | 29148 | 25642 |       |       | 28883 | 28883 | 28881 | 28093 | 28883 | 29148 | 28881 |       | 29148 | 27976 | 25088 | 28881 |       | 28883 |       |
|           |       | 29148 | 28881 |       | 28393 |       |       |       |       | 28882 | 28881 | 29148 | 29750 | 28882 |       |       |       | 28881 | 28253 | 28882 |       | 28975 |
|           |       | 29224 | 28882 |       |       |       |       |       |       | 28883 | 28882 |       |       |       |       | 28883 |       | 28882 | 28628 | 28883 |       | 29754 |
|           |       |       | 28883 |       |       |       |       |       |       | 29744 | 28883 |       |       |       |       |       |       | 28883 | 28881 |       |       |       |
|           |       |       | 29370 |       |       |       |       |       |       |       |       | 29148 |       |       |       |       |       |       | 28882 |       |       |       |
